# Supplementary material
Source: PubMed Central journal article supplement (PMC5464605)
Supplement: NIHMS866869-supplement-4.pdf [file NIHMS866869-supplement-4.pdf]

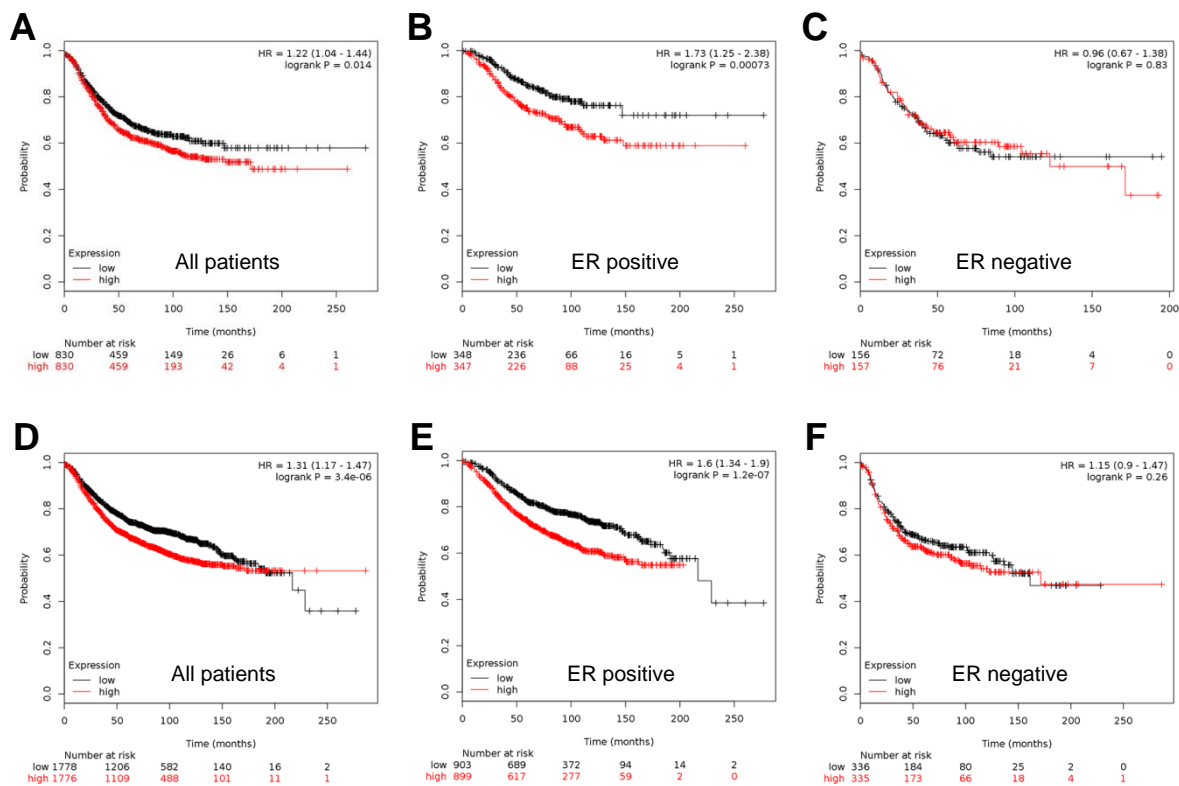

**Supplementary Figure 3.** High *DPP3* mRNA expression correlates with poor relapse-free survival (RFS) of breast cancer patients in the Kaplan-Meier Plotter database. (A-F) Kaplan-Meier (KM) plots comparing RFS of patients based on high (upper half) versus low (lower half) *DPP3* mRNA expression in (A and D) all tumors, (B and E) ER+ tumors, or (C and F) ER- tumors. The correlation curves were generated using the Kaplan-Meier Plotter web portal (<http://kmplot.com/>). *DPP3* mRNA expression was determined using probe 232510\_s\_at (A-C) or 218567\_x\_at (D-F), respectively.
